# Supplementary material for: Myricitrin inhibits fibroblast-like synoviocyte-mediated rheumatoid synovial inflammation and joint destruction by targeting AIM2
Source: PubMed Central journal article supplement (PMC9471193; doi:10.3389/fphar.2022.905376), 2022-08-31
Supplement: DataSheet1.pdf [file DataSheet1.pdf]

### **Supplementary data**

**Supplementary Fig. S1:** Increased levels of AIM2 in RA FLSs. The expression of AIM2 in RA FLSs and HC FLSs was measured by RT-qPCR (**A**) and western blot (**B**). Data show the mean  $\pm$  SD from at least 3 independent experiments. \*P < 0.05 versus HC.

**Supplementary Fig. S2:** The efficiency of AIM2 knockdown. RA FLSs were subjected to RT-qPCR analysis (**A**) and Western blotting (**B**). A representative blot is shown. The data show the mean  $\pm$  SD of samples from at least 3 independent experiments. \*P < 0.05, \*\*P < 0.01 vs. CTR.

**Supplementary Fig. S3:** Immunohistochemical staining was used to measure the expression of IL-6, IL-8, CCL2, MMP-1, MMP-3, MMP-13 in synovial tissues from CIA mice. Representative images were from normal mice, DMSO-treated mice, and Myr-treated mice (original magnification,  $\times 200$ ).

**Supplementary Fig. S4:** Immunohistochemical staining was used to measure the expression of p-AKT in synovial tissues from mice. Representative images were from normal mice, DMSO-treated mice, and Myr-treated mice (original magnification,  $\times 200$ ).

**Supplementary Fig. S5.** Detection of surface molecules and phagocytosis of FLSs. The surface molecules CD11b, Fc $\gamma$ RII, and Fc $\gamma$ RIII receptor were detected by flow cytometry(**A**). Phagocytosis of FLSs were evaluated by fluorescent bead uptake assay. Representative images were shown(**B**) (original magnification,  $\times 100$ ).

**Fig. S1**

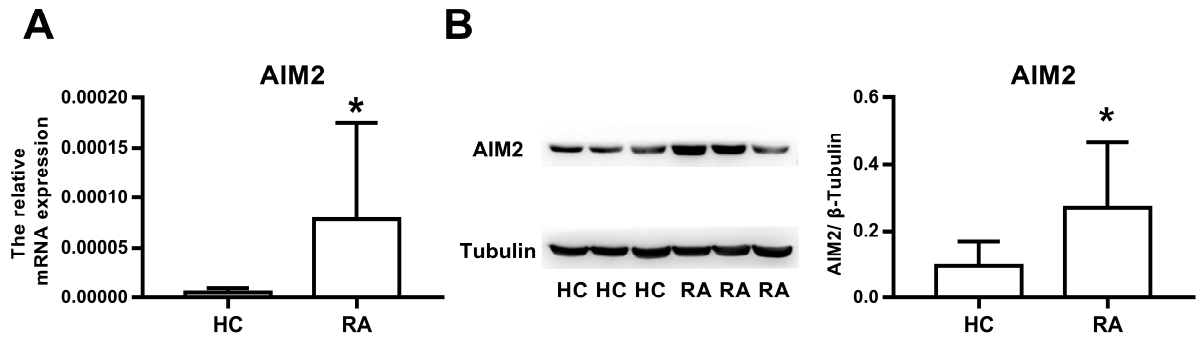

**Fig. S2**

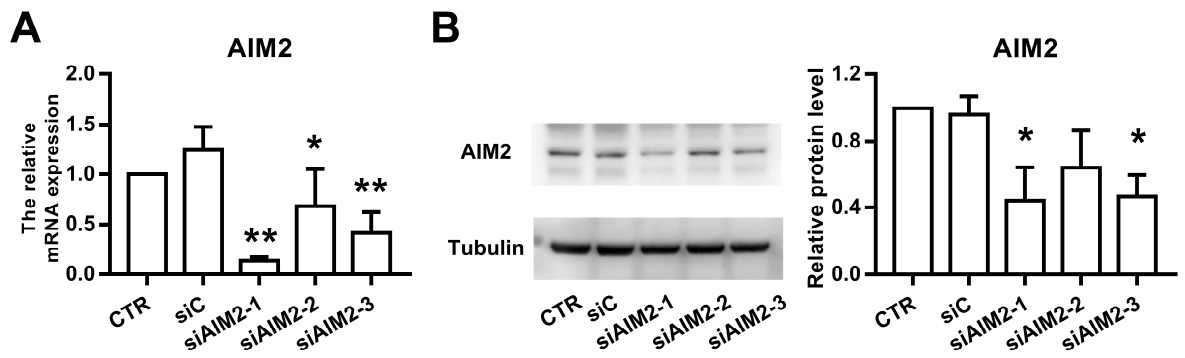

**Fig. S3**

**A**

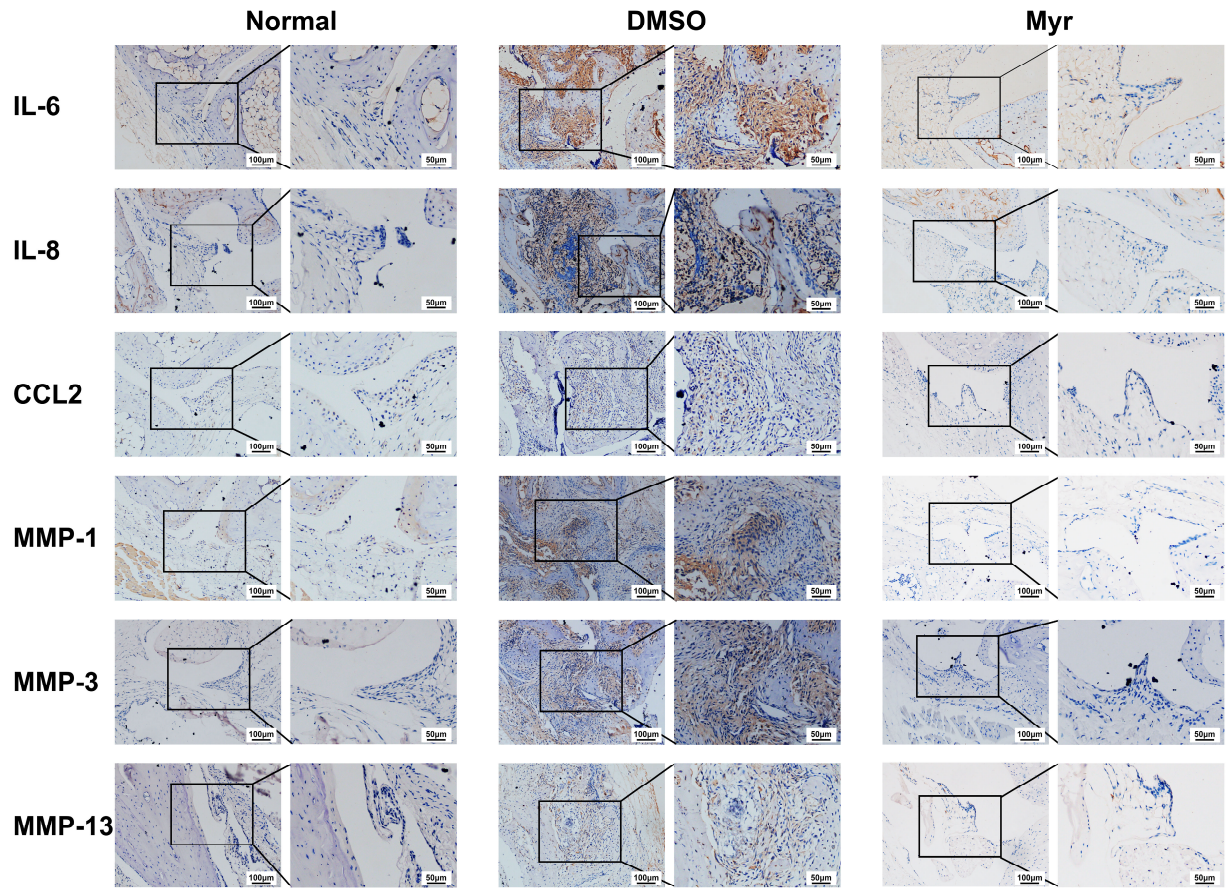

**Fig. S4**

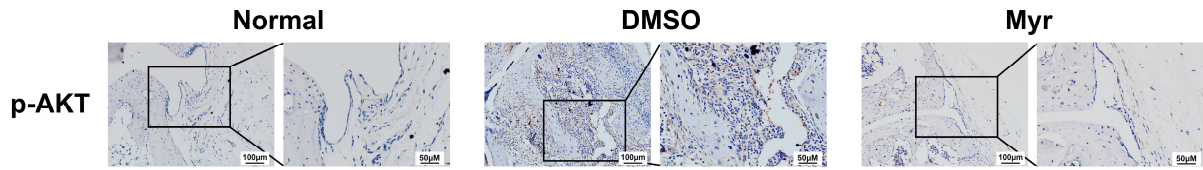

**Fig. S5**

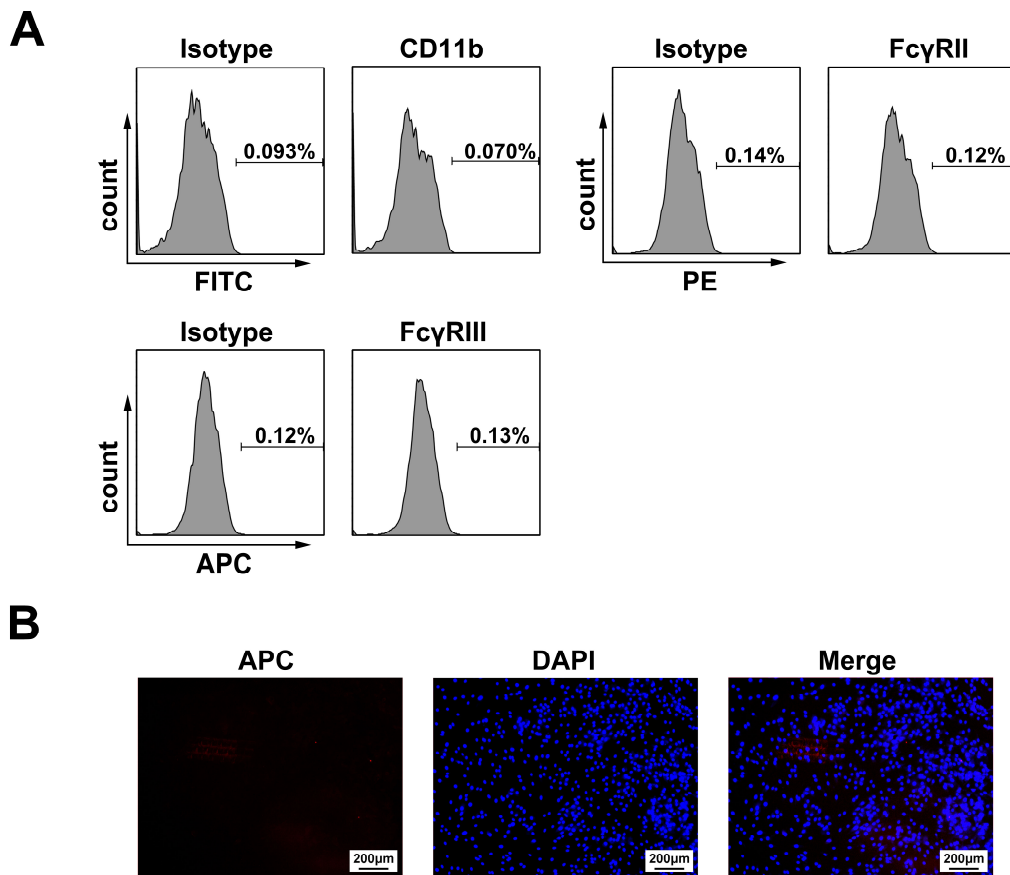

**Table S1: Sequences of primers for RT-qPCR.**

| <b>gene</b>    |         | <b>sequences</b>         |
|----------------|---------|--------------------------|
| AIM2           | Forward | AGCAAGATATTATCGGCACAGTG  |
|                | Reverse | G TTCAGCGGGACATTAACCTT   |
| $\beta$ -actin | Forward | TCAAGATCATTGCTCCTCCTGAG  |
|                | Reverse | ACATCTGCTGGAAGGTGGACA    |
| IL-1 $\beta$   | Forward | ATGATGGCTTATTACAGTGGCAA  |
|                | Reverse | GTCGGAGATTCGTAGCTGGA     |
| IL-6           | Forward | ACTCACCTCTTCAGAACGAATTG  |
|                | Reverse | CCATCTTTGGAAGGTTTCAGGTTG |
| IL-8           | Forward | ACTGAGAGTGATTGAGAGTGGAC  |
|                | Reverse | AACCCTCTGCACCCAGTTTTTC   |
| CCL2           | Forward | CAGCCAGATGCAATCAATGCC    |
|                | Reverse | TGGAATCCTGAACCCACTTCT    |
| MMP-1          | Forward | CTCTGGAGTAATGTCACACCTCT  |
|                | Reverse | TGTTGGTCCACCTTTCATCTTC   |
| MMP-3          | Forward | AAAGACAGGCACTTTTGGCG     |
|                | Reverse | CTTCATATGCGGCATCCACG     |
| MMP-9          | Forward | TGTACCGCTATGGTTACACTCG   |
|                | Reverse | GGCAGGGACAGTTGCTTCT      |
| MMP-13         | Forward | ACTGAGAGGCTCCGAGAAATG    |
|                | Reverse | GAACCCCGCATCTTGGCTT      |

**Table S2: The sequences of siRNA oligonucleotides.**

|      |         |                     |
|------|---------|---------------------|
| AIM2 | siRNA-1 | GCAACGTGCTGCACCAAAA |
|      | siRNA-2 | GCAGGAATCTATCAGAGAA |
|      | siRNA-3 | GAAGCGCTGTTTGCCAGTT |

**Table S4. Demographic and clinical features of patients with active RA**

|                                 |            |
|---------------------------------|------------|
| Age, yrs (mean ± SD)            | 56.67±4.63 |
| Female: Male                    | 8:2        |
| Disease duration, yrs (mean±SD) | 11.90±6.92 |
| Rheumatoid factor-positive (%)  | 90         |
| Anti-CCP-positive (%)           | 90         |
| DAS28 (mean±SD)                 | 6.09±1.20  |
| Previous medications (%)        |            |
| Prednisone (<10mg/d)            | 30         |
| Methotrexate                    | 70         |
| Leflunomide                     | 10         |
| Sulfasalazine                   | 0          |
| Hydroxychloroquine              | 20         |
| NSAIDs                          | 50         |

**Table S5. Demographic and clinical features of health control subjects**

|                          |             |
|--------------------------|-------------|
| Age, yrs (mean ± SD)     | 37.55±13.33 |
| Female: Male             | 3:7         |
| Previous medications (%) |             |
| Prednisone (<10mg/d)     | 0           |
| Methotrexate             | 0           |
| Leflunomide              | 0           |
| Sulfasalazine            | 0           |
| Hydroxychloroquine       | 0           |
| NSAIDs                   | 80          |
